# Supplementary material for: Porcine Hemagglutinating Encephalomyelitis Virus Infection In Vivo and Ex Vivo
Source: PubMed Central journal article supplement (PMC8316118; doi:10.1128/jvi.02335-20), 2021-05-24
Supplement: jvi.02335-20-s0002.pdf [file jvi.02335-20-s0002.pdf]

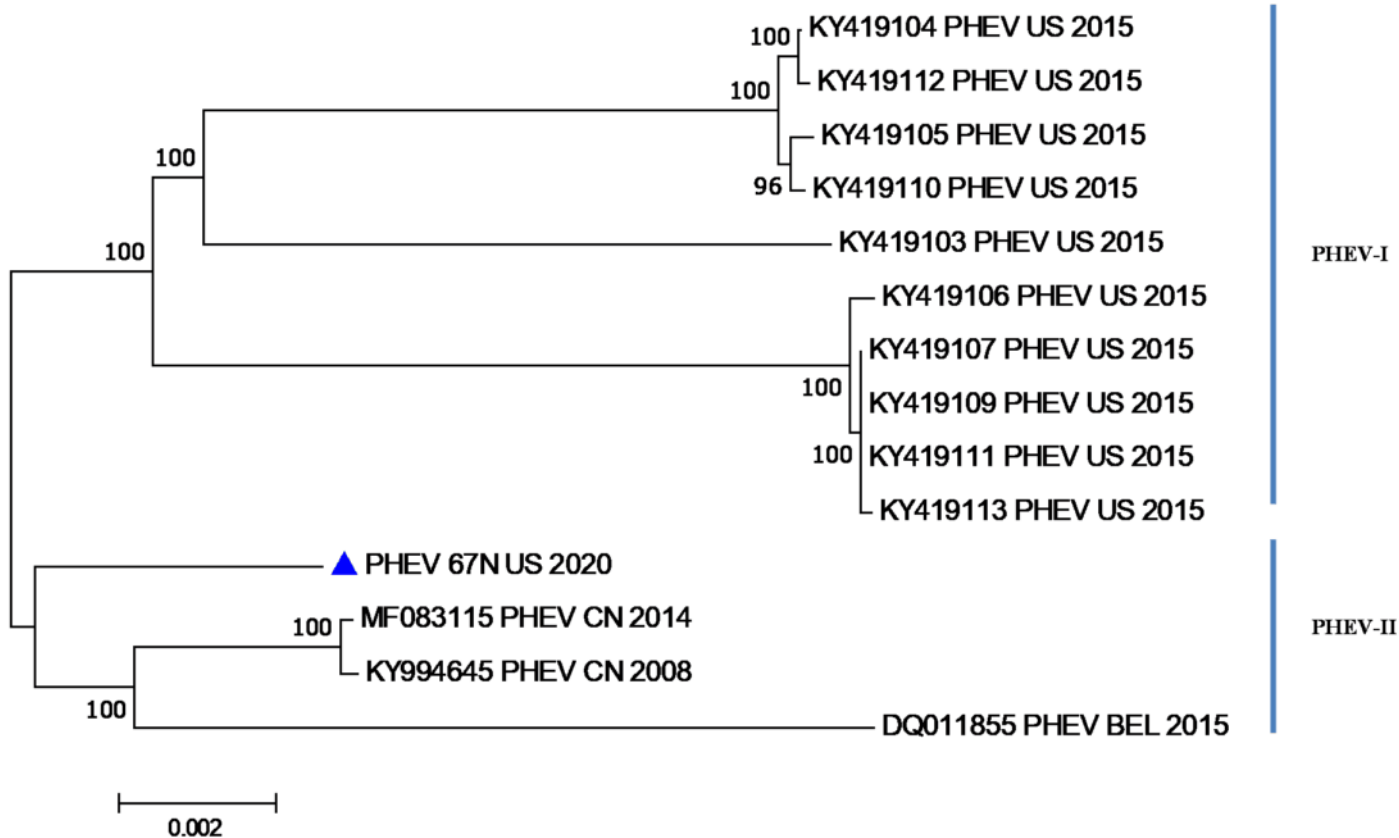

**Fig. S1** Phylogenetic analysis based on the complete genome sequences of PHEV strain 67N (PHEV/67N/US/2020) assembled in this study (blue triangle), and the 13 additional complete sequences from different PHEV isolates available in GenBank. The phylogenetic tree was constructed by the neighbor-joining (NJ) method. Significant bootstrap values are indicated as a percentage for 1000 replicates.

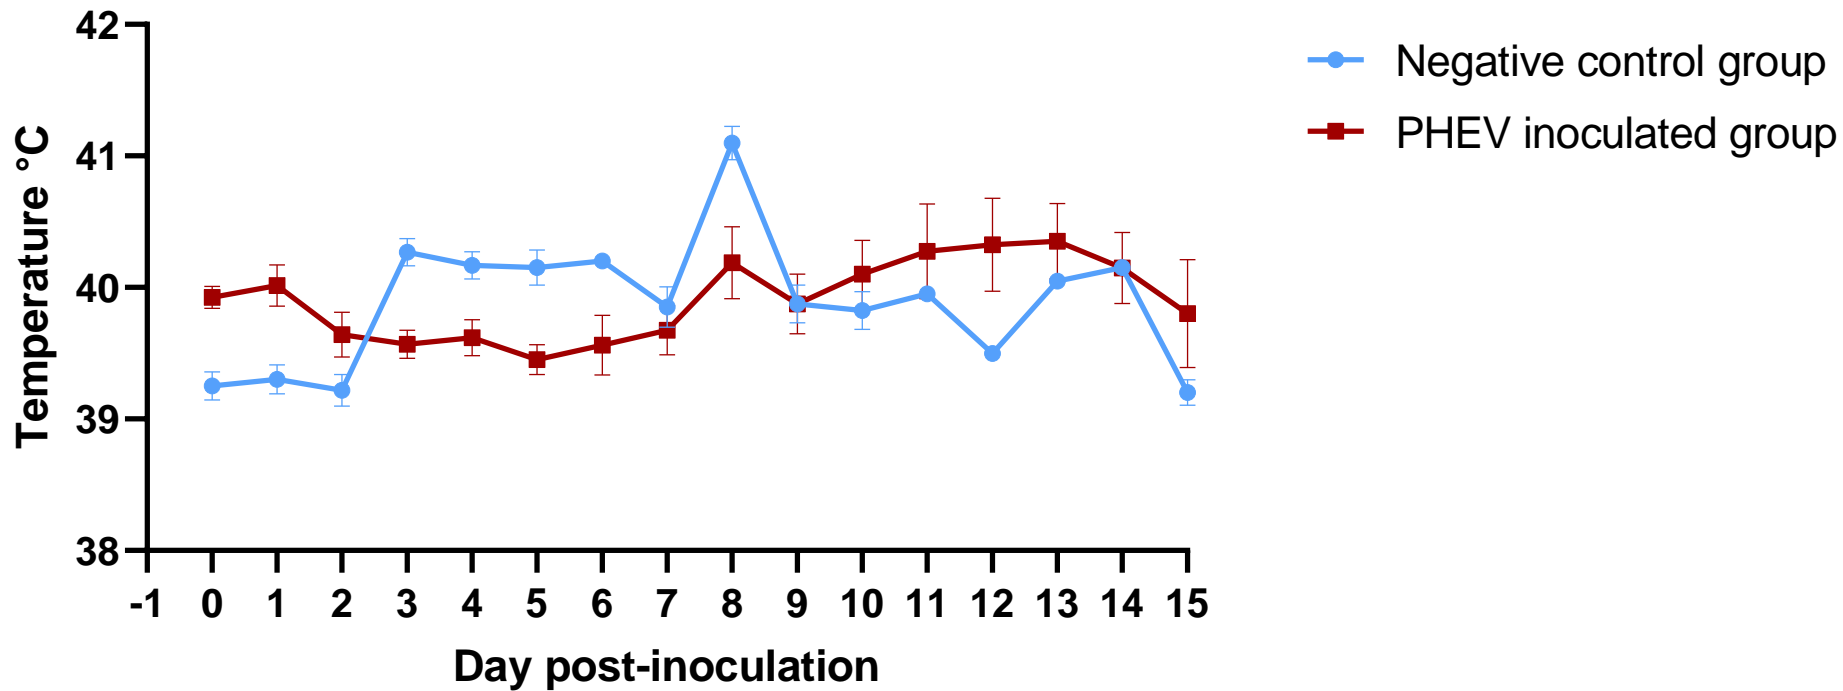



**Movie S1.** Cilia cell development of completely differentiated neonatal pig-derived tracheal cells after 30 days of culture and propagation in transwells.
